# Supplementary material
Source: publisher figshare collection journal article supplement (https://acs.figshare.com/ndownloader/files/18536009)
Supplement: Supplementary file 1 [file 18536009]

## Supporting Information

# One-step generation of multi-stimuli responsive microcapsules *via* multilevel interfacial assembly of polymeric complexes

*Yuanyuan Zhang,<sup>†,‡</sup> Guangming Zhu,<sup>‡</sup> Biqin Dong,<sup>†</sup> Jiaoning Tang,<sup>‡</sup> Jide Li,<sup>‡</sup>*

*Guanghui Yang,<sup>‡</sup> Shuxian Hong,<sup>†</sup> Feng Xing<sup>\*,†</sup>*

<sup>†</sup> Department of Civil Engineering, Guangdong Province Key Laboratory of Durability for Marine Civil Engineering, and <sup>‡</sup> College of Materials Science and Engineering, Shenzhen University, Shenzhen 518060, P. R. China.

[\\*xingf@szu.edu.cn](mailto:*xingf@szu.edu.cn)

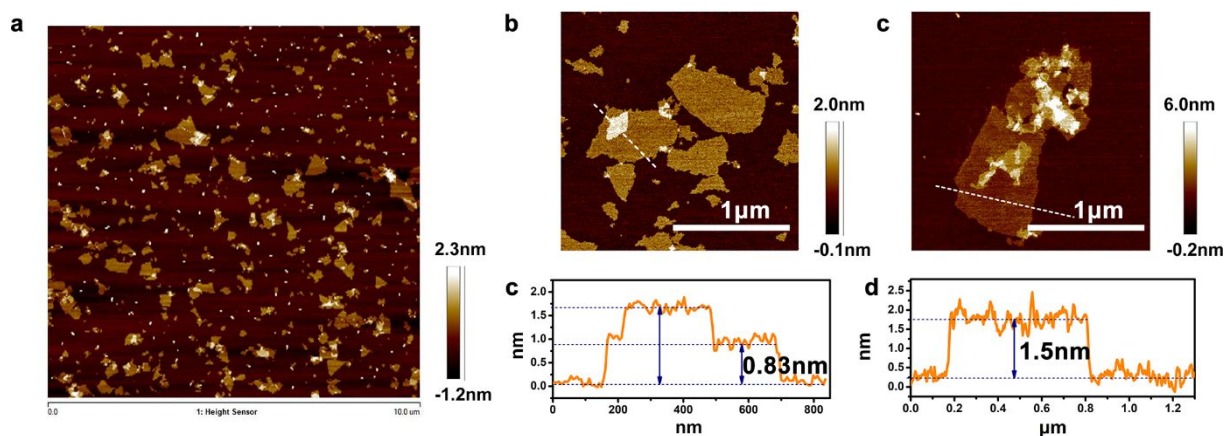

**Figure S1.** AFM images of (a) GO sheets and (b) PDDA<sub>0.15</sub>-GO complexes. (c) and (d) the profiles along the lines in Figure (a) and (b) respectively.

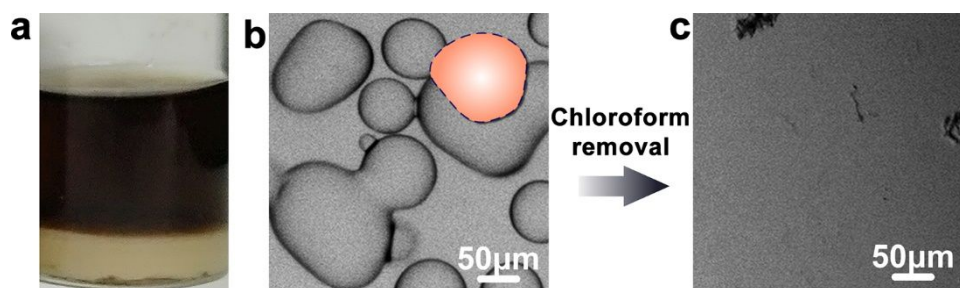

**Figure S2.** (a) Photograph of GO/Chl emulsions. (b, c) Microscope images of GO/Chl emulsions (b) before and (c) after removing chloroform.

The supernatant was diluted into 1/20, 1/10, 3/10 respectively and used to the characterization of UV-Vis spectra. Figure S1a shows the absorption of supernatant diluted into 1/10. Intercept of linear regression were obtained from Figure S1b. The concentration of PSS in chloroform were calculated according to formulas (1) and (2).

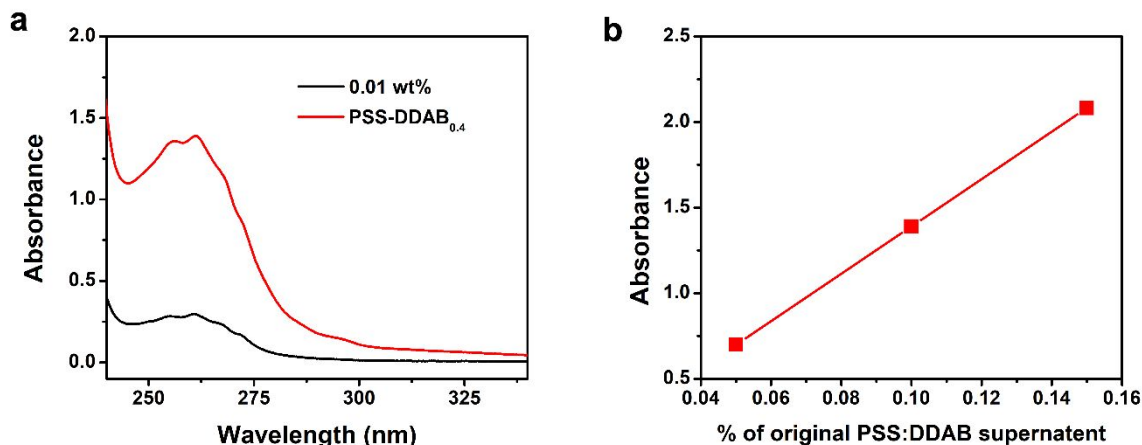

**Figure S3.** (a) UV-Vis spectra of aqueous PSS solution of 0.01 wt% and aqueous supernatant in the mixture with PSS-DDAB<sub>0.4</sub>. (b) UV-Vis spectra absorbance of PSS aqueous supernatant as a function of supernatant dilution (1/20, 1/10, 3/10 of original concentration after extraction).

$$C_p \times V_o = C_o \times V_a - C_s - V_a \quad (1)$$

$$C_s = 0.01 \times \frac{S + I}{A_{0.01wt\%}} \quad (2)$$

$C_o$ : Original PSS concentration in aqueous phase before extraction.

$C_p$ : PSS concentration in chloroform

$C_s$ : PSS concentration in supernatant after centrifugation.

$S$  : Slope of linear regression

$I$  : Intercept of linear regression

$V_a$  : Volume of aqueous phase

$V_o$  : Volume of chloroform.

$A_{0.01wt\%}$ : Absorbance of PSS of 0.01 wt%

### Characterization and calculation of PSS concentration in chloroform.

The supernatant of was diluted into 1/20, 1/10, 3/10 respectively and used to the characterization of UV-Vis spectra. Figure S3a shows the absorption of supernatant diluted into 1/10. Intercept of linear regression were obtained from Figure S3b. The concentration in

chloroform were calculated according to formulas (1) and (2).

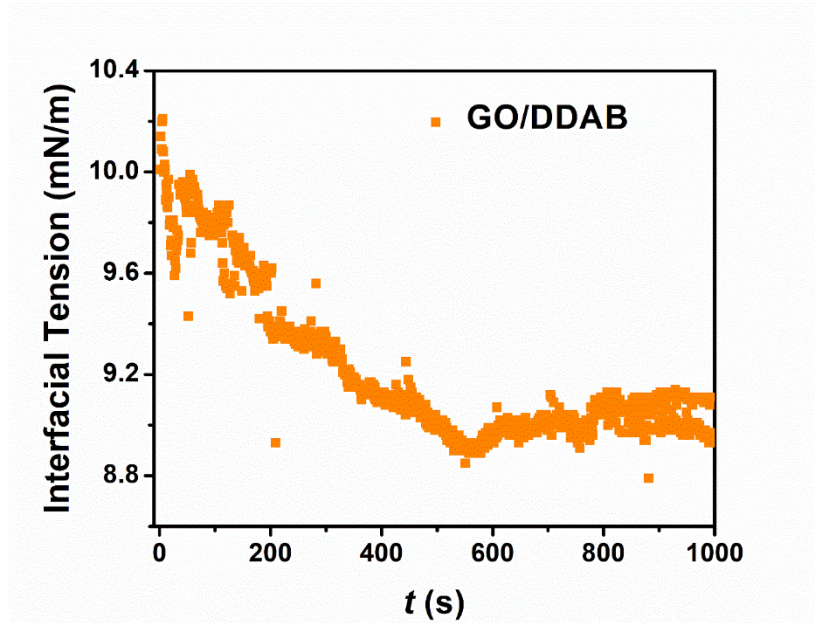

**Figure S4.** Dynamic interfacial tension of aqueous GO solution against chloroform DDAB solution.

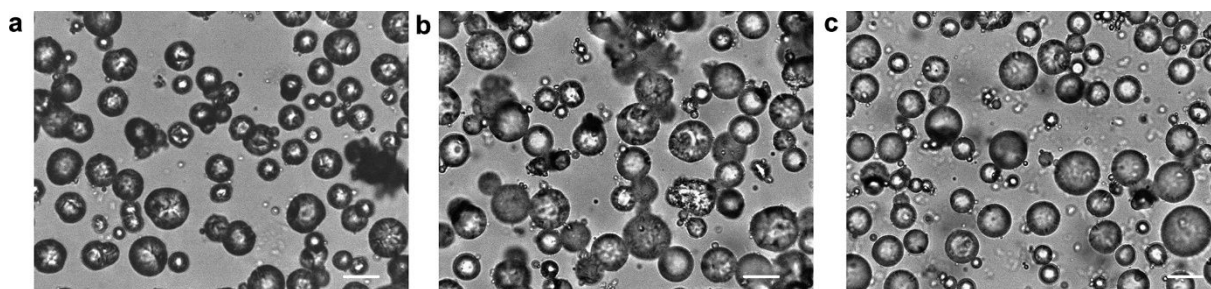

**Figure S5.** Microscope images of  $P_{0.1}$ -GO/S-D emulsions incubated in DI water, HCl (pH = 1.0), NaOH (pH = 14). Scale bar is 20  $\mu\text{m}$ .
